# Supplementary material
Source: Springer Nature journal article supplement (https://www.springermedizin.de/resource/supplementary/12890_2013_499_MOESM2_ESM.pdf/9505638)

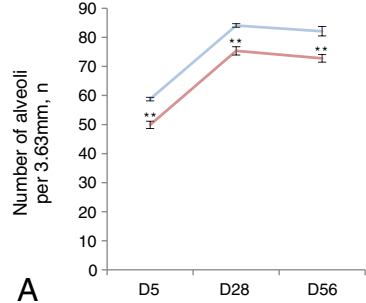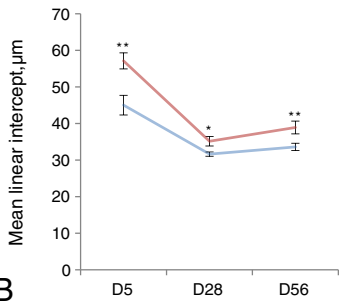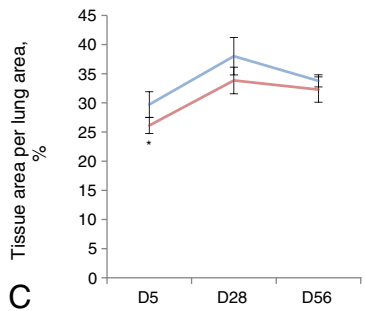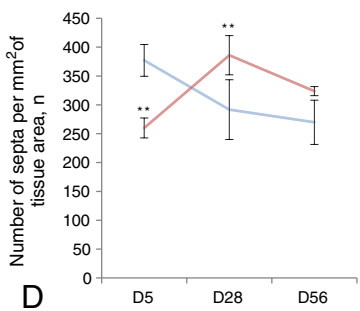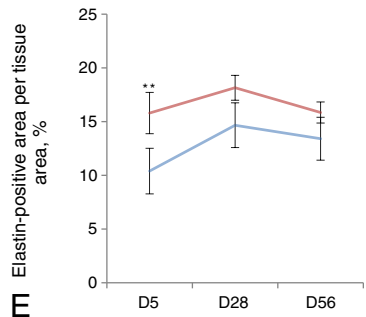

— Normoxia  
— Hyperoxia

Supplement: MOESM2 [file 9505638]
